# Supplementary material for: Neural activation patterns associated with mouthbrooding, maternal care, infanticide and fry release in an African cichlid fish
Source: Oxford University Press journal article supplement (doi:10.1242/jeb.244854), 2023-03-15
Supplement: jeb244854supp.pdf [file jeb244854supp.pdf]

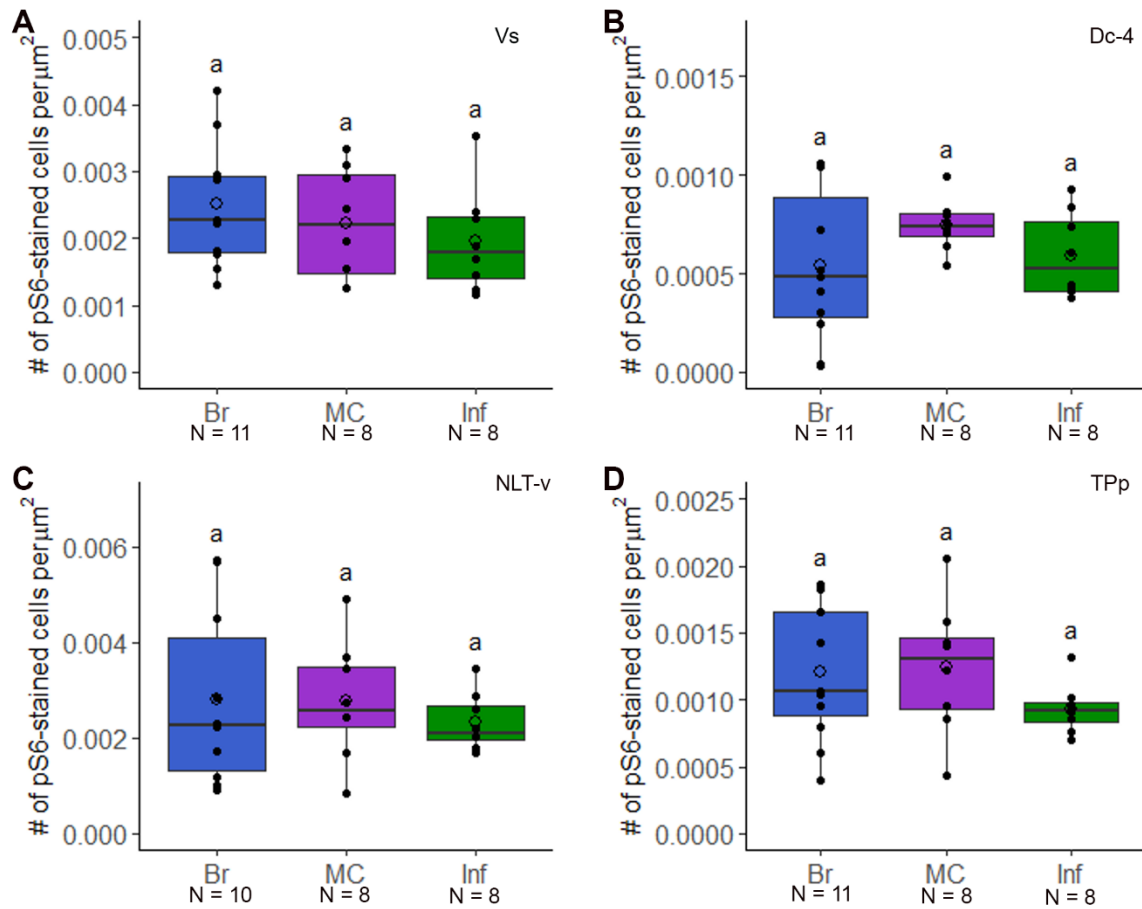

**Fig. S1.** Neural activation did not differ among mouthbrooding (Br), Maternal care (MC), and Infanticide (Inf) females in the Vs (a), Dc-4 (b), NLT-v (c), or TPs (d). Sample sizes: N = 11 Mouthbrooding (Vs, Dc-4, TPs); N = 10 Mouthbrooding (NLT-v); N = 8 Maternal Care; N = 8 Infanticide. See figure 2 for boxplot description.

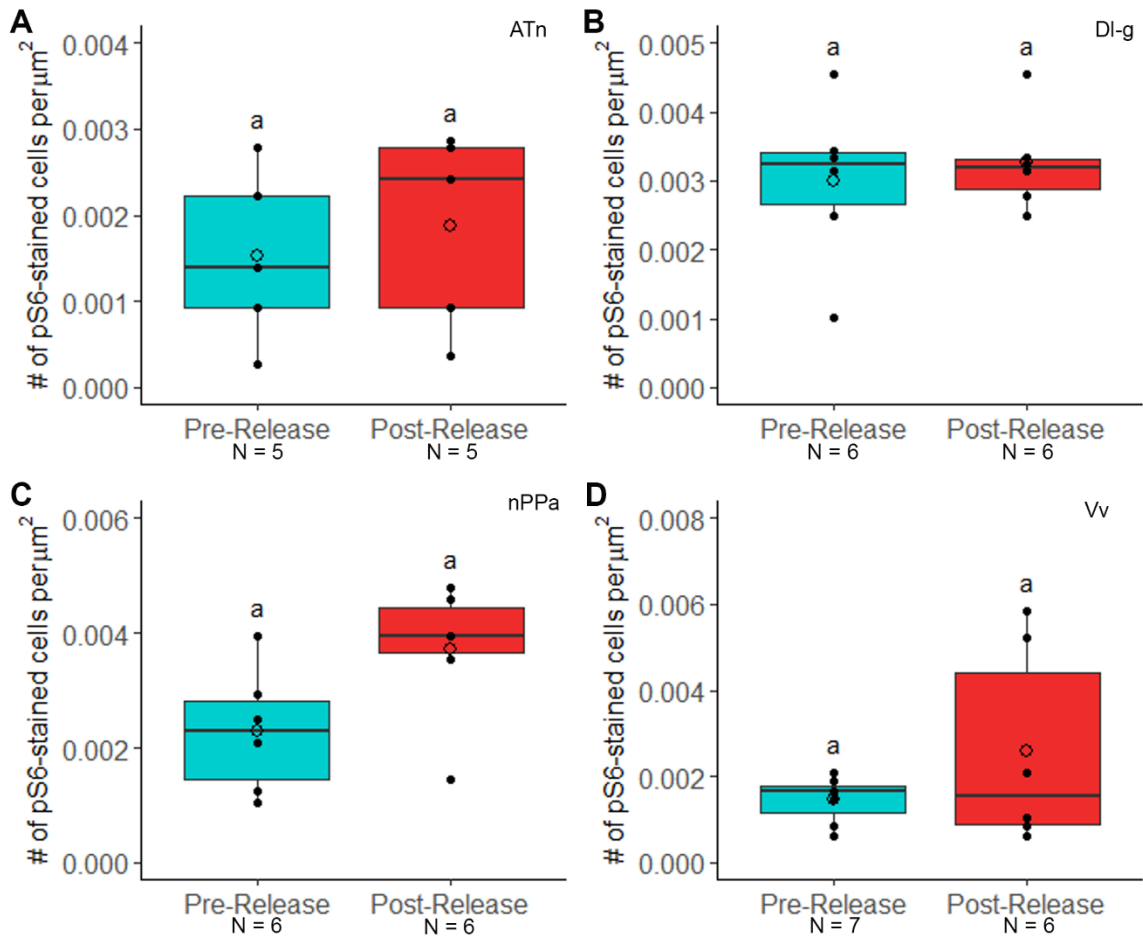

**Fig. S2.** Neural activation did not differ between pre- and post-release fry in the Vv (a), DI-g (b), nPPa (c), or ATn (d). Samples sizes: N = 7 Pre-Release (Vv); N = 6 Pre-Release (DI-g, nPPa); N = 5 Pre-Release (ATn); N = 6 Post-Release (DI-g, nPPa, Vv), N = 5 Post-Release (ATn). See figure 2 for boxplot description.

**Table S1. Brain regions analyzed in adult females, putative homologs, and magnifications, gridline sizes, and box numbers used to quantify regions of interest.**

| Region | Putative homolog                  | Mag. | Gridlines ( $\mu\text{m}$ ) | Boxes |
|--------|-----------------------------------|------|-----------------------------|-------|
| ATn    | Ventromedial hypothalamus         | 20x  | 50 x 50                     | 4     |
| Dc-4   | Globulus pallidus cortex, in part | 10x  | 100 x 100                   | 3     |
| Dc-5   | Globulus pallidus cortex, in part | 10x  | 100 x 100                   | 3     |
| DI-g   | Medial pallium, hippocampus       | 10x  | 100 x 100                   | 5     |
| NLTv   | Arcuate nucleus, in part          | 20x  | 40 x 40                     | 4     |
| nPPa   | Preoptic area                     | 20x  | 50 x 50                     | 5     |
| TPp    | Ventral tegmental area            | 20x  | 50 x 50                     | 5     |
| Vd-r   | Nucleus accumbens, striatum       | 20x  | 50 x 50                     | 4     |
| Vs     | Medial extended amygdala, in part | 20x  | 50 x 50                     | 4     |

**Table S2. Regions analyzed in pre- and post-release fry, putative homologs, and magnifications, gridline sizes, and box numbers used to quantify regions of interest**

| Region       | Putative homolog                          | Mag. | Gridlines ( $\mu\text{m}$ ) | Boxes |
|--------------|-------------------------------------------|------|-----------------------------|-------|
| nPPa         | Preoptic area                             | 20x  | 20 x 20                     | 3     |
| ATn          | Ventromedial hypothalamus                 | 20x  | 30 x 30                     | 3     |
| DI-g         | Medial pallium, hippocampus               | 20x  | 30 x 30                     | 3     |
| Dm           | Pallial amygdala                          | 20x  | 30 x 30                     | 4     |
| INL          | Inner nuclear layer of retina             | 20x  | 50 x 50                     | 3     |
| PGZ (Tectum) | Superior colliculus                       | 20x  | 30 x 30                     | 3     |
| TPp          | Ventral tegmental area                    | 20x  | 30 x 30                     | 3     |
| Vd-r         | Nucleus accumbens, striatum               | 20x  | 15 x 15                     | 3     |
| Vs-m         | Medial extended amygdala, in part         | 20x  | 50 x 50                     | 3     |
| Vv           | Septum, external globus pallidus, in part | 20x  | 20 x 20                     | 3     |

**Table S3. Spearman correlation coefficients ( $\rho$ ) and P-values for correlations of pS6 stained cell density across 9 brain regions in mouthbrooding, maternal care providing, and infanticide exhibiting females. Bold indicates significance at  $P < 0.05$ .**

| <b>Mouthbrooding</b> |        | TPp          | Vd-c          | nPPa          | Dc4    | Dc5    | ATn              | NLT-v        | DI-g             |
|----------------------|--------|--------------|---------------|---------------|--------|--------|------------------|--------------|------------------|
| Vd-c                 | $\rho$ | -0.296       |               |               |        |        |                  |              |                  |
|                      | P      | 0.353        |               |               |        |        |                  |              |                  |
| nPPa                 | $\rho$ | -0.510       | 0.291         |               |        |        |                  |              |                  |
|                      | P      | 0.102        | 0.369         |               |        |        |                  |              |                  |
| Dc4                  | $\rho$ | 0.059        | -0.145        | -0.118        |        |        |                  |              |                  |
|                      | P      | 0.839        | 0.653         | 0.714         |        |        |                  |              |                  |
| Dc5                  | $\rho$ | 0.478        | -0.291        | 0.191         | 0.300  |        |                  |              |                  |
|                      | P      | 0.124        | 0.369         | 0.557         | 0.353  |        |                  |              |                  |
| Atn                  | $\rho$ | <b>0.656</b> | -0.300        | <b>-0.636</b> | 0.127  | 0.200  |                  |              |                  |
|                      | P      | <b>0.026</b> | 0.353         | <b>0.032</b>  | 0.693  | 0.538  |                  |              |                  |
| NLT-v                | $\rho$ | 0.091        | -0.218        | -0.491        | -0.027 | -0.164 | <b>0.727</b>     |              |                  |
|                      | P      | 0.776        | 0.502         | 0.116         | 0.924  | 0.614  | <b>0.009</b>     |              |                  |
| DI-g                 | $\rho$ | 0.404        | <b>-0.729</b> | -0.232        | -0.200 | 0.346  | <b>0.624</b>     | 0.579        |                  |
|                      | P      | 0.210        | <b>0.009</b>  | 0.467         | 0.538  | 0.283  | <b>0.035</b>     | 0.056        |                  |
| Vs                   | $\rho$ | <b>0.647</b> | -0.591        | -0.491        | -0.145 | 0.209  | <b>0.864</b>     | <b>0.600</b> | <b>0.870</b>     |
|                      | P      | <b>0.029</b> | 0.051         | 0.116         | 0.653  | 0.520  | <b>&lt;0.001</b> | <b>0.047</b> | <b>&lt;0.001</b> |

| <b>Maternal Care</b> |        | TPp          | Atn          | NLT-v  | DI-g         | Vs     | Vd-c         | nPPa   | Dc-4  |
|----------------------|--------|--------------|--------------|--------|--------------|--------|--------------|--------|-------|
| Atn                  | $\rho$ | <b>0.650</b> |              |        |              |        |              |        |       |
|                      | P      | <b>0.050</b> |              |        |              |        |              |        |       |
| NLT-v                | $\rho$ | 0.603        | 0.318        |        |              |        |              |        |       |
|                      | P      | 0.077        | 0.381        |        |              |        |              |        |       |
| DI-g                 | $\rho$ | <b>0.817</b> | <b>0.750</b> | 0.259  |              |        |              |        |       |
|                      | P      | <b>0.004</b> | <b>0.016</b> | 0.462  |              |        |              |        |       |
| Vs                   | $\rho$ | 0.435        | 0.285        | 0.244  | 0.151        |        |              |        |       |
|                      | P      | 0.223        | 0.434        | 0.491  | 0.676        |        |              |        |       |
| Vd-c                 | $\rho$ | 0.367        | 0.383        | 0.276  | 0.250        | 0.485  |              |        |       |
|                      | P      | 0.308        | 0.285        | 0.434  | 0.491        | 0.169  |              |        |       |
| nPPa                 | $\rho$ | <b>0.783</b> | <b>0.667</b> | 0.377  | <b>0.767</b> | -0.109 | 0.200        |        |       |
|                      | P      | <b>0.009</b> | <b>0.043</b> | 0.285  | <b>0.012</b> | 0.742  | 0.580        |        |       |
| Dc-4                 | $\rho$ | 0.433        | 0.367        | -0.084 | 0.500        | 0.285  | <b>0.783</b> | 0.367  |       |
|                      | P      | 0.223        | 0.308        | 0.809  | 0.153        | 0.434  | <b>0.009</b> | 0.308  |       |
| Dc-5                 | $\rho$ | 0.183        | 0.250        | -0.259 | -0.017       | 0.628  | 0.233        | -0.017 | 0.350 |
|                      | P      | 0.612        | 0.491        | 0.462  | 0.948        | 0.058  | 0.520        | 0.948  | 0.331 |

| Infanticide |        | TPp    | Atn          | NLT-v  | DI-g   | Vs               | Vd-c         | nPPa         | Dc-4         |
|-------------|--------|--------|--------------|--------|--------|------------------|--------------|--------------|--------------|
| Atn         | $\rho$ | 0.181  |              |        |        |                  |              |              |              |
|             | P      | 0.557  |              |        |        |                  |              |              |              |
| NLT-v       | $\rho$ | 0.080  | 0.531        |        |        |                  |              |              |              |
|             | P      | 0.800  | 0.071        |        |        |                  |              |              |              |
| DI-g        | $\rho$ | -0.085 | 0.368        | -0.294 |        |                  |              |              |              |
|             | P      | 0.783  | 0.224        | 0.340  |        |                  |              |              |              |
| Vs          | $\rho$ | 0.429  | 0.428        | 0.093  | 0.420  |                  |              |              |              |
|             | P      | 0.157  | 0.157        | 0.766  | 0.165  |                  |              |              |              |
| Vd-c        | $\rho$ | 0.362  | 0.187        | -0.181 | 0.194  | <b>0.832</b>     |              |              |              |
|             | P      | 0.233  | 0.542        | 0.557  | 0.527  | <b>&lt;0.001</b> |              |              |              |
| nPPa        | $\rho$ | 0.203  | <b>0.764</b> | 0.566  | -0.051 | 0.437            | 0.451        |              |              |
|             | P      | 0.513  | <b>0.003</b> | 0.051  | 0.869  | 0.150            | 0.130        |              |              |
| Dc-4        | $\rho$ | 0.299  | 0.330        | 0.118  | 0.158  | 0.455            | <b>0.605</b> | <b>0.618</b> |              |
|             | P      | 0.329  | 0.284        | 0.699  | 0.603  | 0.130            | <b>0.033</b> | <b>0.031</b> |              |
| Dc-5        | $\rho$ | -0.051 | -0.095       | 0.240  | -0.158 | -0.002           | 0.129        | 0.194        | <b>0.664</b> |
|             | P      | 0.869  | 0.749        | 0.442  | 0.603  | 0.991            | 0.683        | 0.527        | <b>0.017</b> |

**Table S4. Spearman correlation coefficients ( $\rho$ ) and P-values for correlations of pS6 stained cell density across 10 regions in pre-release and post-release fry. Bold indicates significance at  $p < 0.05$ .**

| Pre-Release  |        | DI-g         | Atn    | nPPa         | TPp           | PGZ          | INL    | Dm            | Vs     | Vd    |
|--------------|--------|--------------|--------|--------------|---------------|--------------|--------|---------------|--------|-------|
| Atn          | $\rho$ | -0.210       |        |              |               |              |        |               |        |       |
|              | P      | 0.578        |        |              |               |              |        |               |        |       |
| nPPa         | $\rho$ | 0.000        | -0.049 |              |               |              |        |               |        |       |
|              | P      | 0.977        | 0.885  |              |               |              |        |               |        |       |
| TPp          | $\rho$ | 0.099        | 0.642  | 0.648        |               |              |        |               |        |       |
|              | P      | 0.794        | 0.072  | 0.072        |               |              |        |               |        |       |
| PGZ          | $\rho$ | <b>0.745</b> | -0.286 | 0.313        | 0.222         |              |        |               |        |       |
|              | P      | <b>0.029</b> | 0.460  | 0.423        | 0.578         |              |        |               |        |       |
| INL          | $\rho$ | -0.242       | -0.356 | -0.060       | -0.309        | 0.121        |        |               |        |       |
|              | P      | 0.537        | 0.353  | 0.839        | 0.423         | 0.749        |        |               |        |       |
| Dm           | $\rho$ | 0.482        | -0.366 | 0.575        | 0.295         | <b>0.761</b> | -0.240 |               |        |       |
|              | P      | 0.207        | 0.353  | 0.120        | 0.460         | <b>0.021</b> | 0.537  |               |        |       |
| Vs           | $\rho$ | -0.037       | -0.200 | <b>0.761</b> | 0.289         | 0.312        | 0.380  | 0.268         |        |       |
|              | P      | 0.885        | 0.619  | <b>0.021</b> | 0.460         | 0.423        | 0.321  | 0.498         |        |       |
| Vd           | $\rho$ | -0.432       | 0.475  | -0.233       | 0.076         | -0.403       | 0.552  | <b>-0.805</b> | 0.125  |       |
|              | P      | 0.260        | 0.207  | 0.537        | 0.839         | 0.290        | 0.139  | <b>0.010</b>  | 0.749  |       |
| Vv           | $\rho$ | -0.567       | -0.161 | <b>0.715</b> | 0.273         | -0.231       | 0.230  | 0.133         | 0.506  | 0.037 |
|              | P      | 0.120        | 0.662  | <b>0.037</b> | 0.498         | 0.537        | 0.537  | 0.705         | 0.182  | 0.885 |
| Post-Release |        | DI-g         | Atn    | nPPa         | TPp           | PGZ          | INL    | Dm            | Vs     | Vd    |
| Atn          | $\rho$ | 0.396        |        |              |               |              |        |               |        |       |
|              | P      | 0.341        |        |              |               |              |        |               |        |       |
| nPPa         | $\rho$ | 0.162        | 0.691  |              |               |              |        |               |        |       |
|              | P      | 0.660        | 0.074  |              |               |              |        |               |        |       |
| TPp          | $\rho$ | 0.649        | 0.127  | 0.309        |               |              |        |               |        |       |
|              | P      | 0.096        | 0.720  | 0.438        |               |              |        |               |        |       |
| PGZ          | $\rho$ | -0.607       | -0.324 | 0.234        | -0.468        |              |        |               |        |       |
|              | P      | 0.121        | 0.438  | 0.545        | 0.255         |              |        |               |        |       |
| INL          | $\rho$ | 0.679        | 0.378  | 0.090        | 0.450         | -0.429       |        |               |        |       |
|              | P      | 0.074        | 0.341  | 0.781        | 0.255         | 0.297        |        |               |        |       |
| Dm           | $\rho$ | -0.286       | 0.090  | 0.126        | -0.667        | 0.536        | -0.286 |               |        |       |
|              | P      | 0.491        | 0.781  | 0.720        | 0.074         | 0.181        | 0.491  |               |        |       |
| Vs           | $\rho$ | 0.649        | 0.564  | 0.382        | 0.345         | -0.252       | 0.667  | -0.378        |        |       |
|              | P      | 0.096        | 0.150  | 0.341        | 0.388         | 0.545        | 0.074  | 0.341         |        |       |
| Vd           | $\rho$ | -0.559       | 0.036  | 0.118        | <b>-0.800</b> | 0.613        | -0.667 | 0.577         | -0.145 |       |
|              | P      | 0.150        | 0.905  | 0.781        | <b>0.025</b>  | 0.121        | 0.074  | 0.150         | 0.720  |       |
| Vv           | $\rho$ | 0.036        | 0.613  | 0.613        | -0.360        | 0.321        | -0.143 | <b>0.786</b>  | 0.072  | 0.559 |
|              | P      | 0.905        | 0.121  | 0.121        | 0.388         | 0.438        | 0.720  | <b>0.025</b>  | 0.843  | 0.150 |
